# Supplementary material for: Design and performance evaluation of a medium flow sampler for airborne brominated flame retardants (BFRs)
Source: Royal Society of Chemistry journal article supplement (doi:10.1039/b817298f), 2009-01-01
Supplement: b817298f.pdf [file b817298f.pdf]

**Supplemental Table 1.** Selected indoor PBDE studies showing average total and vapor phase concentration ( $\text{pg m}^{-3}$ ). Estimated vapor concentrations use ratios in Supplemental Table 4. All passive samplers were covered with a shelter; <sup>a</sup>NA= not available; <sup>b</sup>Sum of congeners 17, 28/33, 47, 85, 99, 100, 153, 154 and 183; <sup>c</sup>Personal sampling.

| Reference                        | Country | Location                      | Method               | n  | Total (vapor + particulate) Concentration |         |          |          |          |                   | Estimated Vapor Concentration |         |         |           |         |              |
|----------------------------------|---------|-------------------------------|----------------------|----|-------------------------------------------|---------|----------|----------|----------|-------------------|-------------------------------|---------|---------|-----------|---------|--------------|
|                                  |         |                               |                      |    | BDE-47                                    | BDE-99  | BDE-100  | BDE-153  | BDE-154  | $\Sigma$ BDE      | BDE-47                        | BDE-99  | BDE-100 | BDE-153   | BDE-154 | $\Sigma$ BDE |
| Wilford et al., 2004             | Canada  | Home                          | Passive <sup>a</sup> | 73 | 160                                       | 42      | 1        | 106      | 1.9      | 260               | 123                           | 25      | 0.64    | 35        | 0.7     | 184          |
| Harrad et al., 2004              | U.K.    | Home                          | Active               | 7  | 420                                       | 70      | 27       | 1.9      | 1.9      | 530               | 323                           | 42      | 17      | 0.6       | 0.7     | 383          |
| Harrad et al., 2006              | U.K.    | Home                          | Passive              | 31 | NA <sup>b</sup>                           | NA      | NA       | NA       | NA       | 52                | NA                            | NA      | NA      | NA        | NA      | 29           |
| Shoeib et al., 2004              | USA     | Home                          | Active               | 4  | NA                                        | NA      | NA       | NA       | NA       | 1520 <sup>b</sup> | NA                            | NA      | NA      | NA        | NA      | 836          |
| Allen et al., 2007               | USA     | Bedroom                       | Active               | 20 | <62-780                                   | <57-390 | <8.8-100 | <3.2-27  | <4.2-140 | 170-1530          | <48-600                       | <34-234 | <6-64   | <1-9      | <1.6-53 | 90.6-960     |
| Allen et al., 2007               | USA     | Living room                   | Active               | 20 | <62-2370                                  | <49-550 | <10-160  | <0.32-11 | <4.2-61  | 220-3540          | <48-1825                      | <29-320 | <6-102  | <0.11-3.6 | <1.6-23 | 85-2274      |
| Harrad et al., 2004              | U.K.    | Office                        | Active               | 10 | 1669                                      | 852     | 217      | 22       | 28       | 2788              | 1285                          | 511     | 139     | 7         | 11      | 1953         |
| Harrad et al., 2006              | U.K.    | Office                        | Passive              | 33 | NA                                        | NA      | NA       | NA       | NA       | 166               | NA                            | NA      | NA      | NA        | NA      | 91           |
| Shoeib et al., 2004              | USA     | Laboratory                    | Active               | 2  | NA                                        | NA      | NA       | NA       | NA       | 380 <sup>c</sup>  | NA                            | NA      | NA      | NA        | NA      | 209          |
| Pettersson-Julander et al., 2004 | Sweden  | Electronic recycling facility | Active               | 12 | 5100                                      | 8000    | 900      | 4000     | 990      | 77000             | 3927                          | 4800    | 576     | 1320      | 3762    | 42350        |
| Harrad et al., 2006              | U.K.    | Car                           | Passive              | 25 | NA                                        | NA      | NA       | NA       | NA       | 709               | NA                            | NA      | NA      | NA        | NA      | 390          |

**Supplemental Table 2.** Selected outdoor PBDE studies from the literature with average total (particulate and vapor phase, if reported) concentrations ( $\text{pg m}^{-3}$ ) Top two highest concentrations shown in bold. Estimated vapor concentrations use ratios in Supplemental Table 4. All passive samplers were covered with a shelter; <sup>a</sup>NA= not available; <sup>b</sup>Sum of congeners 17, 28/33, 47, 85, 99, 100, 153,154 and 183; <sup>c</sup>Personal sampling.

| Reference               | Country     | Location             | Method            | N         | Total (vapor + particulate) Concentration |            |           |            |            |             |                 | Estimated Vapor Concentration |          |            |         |         |         |              |
|-------------------------|-------------|----------------------|-------------------|-----------|-------------------------------------------|------------|-----------|------------|------------|-------------|-----------------|-------------------------------|----------|------------|---------|---------|---------|--------------|
|                         |             |                      |                   |           | BDE-47                                    | BDE-99     | BDE-100   | BDE-153    | BDE-154    | BDE-209     | $\Sigma$ BDE    | BDE-47                        | BDE-99   | BDE-100    | BDE-153 | BDE-154 | BDE-209 | $\Sigma$ BDE |
| Strandberg et al., 2001 | USA         | Eagle Harbor         | Active            | 12        | 2.9                                       | 2.1        | 0.29      | 0.13       | 0.088      | <0.1        | 5.5             | 2.2                           | 1.3      | 0.19       | 0.04    | 0.033   | <0.03   | 3.8          |
| Strandberg et al., 2001 | USA         | Sturgeon Point       | Active            | 12        | 3.8                                       | 2.8        | 0.39      | 0.19       | 0.11       | <0.1        | 7.2             | 2.9                           | 1.7      | 0.25       | 0.06    | 0.04    | <0.03   | 5.1          |
| Strandberg et al., 2001 | USA         | Sleeping Bear Dunes  | Active            | 12        | 8.4                                       | 5.3        | 0.8       | 0.25       | 0.15       | <0.1        | 15              | 6.5                           | 3.2      | 0.5        | 0.08    | 0.06    | <0.03   | 10           |
| Strandberg et al., 2001 | USA         | Chicago              | Active            | 12        | <b>33</b>                                 | <b>16</b>  | 2         | 0.53       | 0.41       | 0.3         | 52              | 25                            | 9.6      | 1.3        | 0.17    | 0.16    | NA      | 36           |
| Shoeb et al., 2004      | USA         | Semi-urban           | Active            | 2         | NA <sup>b</sup>                           | NA         | NA        | NA         | NA         | NA          | 43 <sup>c</sup> | NA                            | NA       | NA         | NA      | NA      | NA      | 24           |
| Hoh & Hites, 2005       | USA         | Chicago              | Active            | 28        | 17.4                                      | 7.4        | 1.8       | NA         | NA         | <b>60.1</b> | <b>100</b>      | 13.4                          | 4.4      | 1.2        | NA      | NA      | 17.4    | 55           |
| Hoh & Hites, 2005       | USA         | Michigan             | Active            | 35        | 6.2                                       | 5.1        | 1.1       | NA         | NA         | 1.4         | 16.2            | 4.8                           | 3.1      | 0.7        | NA      | NA      | 0.4     | 8.91         |
| Hoh & Hites, 2005       | USA         | Indiana              | Active            | <b>38</b> | 7.1                                       | 5.1        | 1         | NA         | NA         | 2.2         | 19              | 5.5                           | 3.1      | 0.6        | NA      | NA      | 0.6     | 10.45        |
| Hoh & Hites, 2005       | USA         | Louisiana            | Active            | 26        | 6.9                                       | 3          | 0.7       | NA         | NA         | 2.8         | 16.4            | 5.3                           | 1.8      | 0.4        | NA      | NA      | 0.8     | 9.02         |
| Hoh & Hites, 2005       | USA         | Arkansas             | Active            | 30        | 9.2                                       | 5.4        | 1.2       | NA         | NA         | <b>9.1</b>  | 30              | 7.1                           | 3.2      | 0.8        | NA      | NA      | 2.6     | 16.5         |
| Wilford et al., 2004    | Canada      | Ottawa               | Passive           | 5         | 0.87                                      | 1.1        | 0.11      | NA         | NA         | NA          | 2.2             | 0.67                          | 0.66     | 0.07       | NA      | NA      | NA      | 1.4          |
| Gouin et al., 2002      | Canada      | Ontario              | Active            | <b>43</b> | <b>150</b>                                | <b>110</b> | <b>20</b> | <b>13</b>  | <b>8</b>   | NA          | <b>295</b>      | 115.5                         | 66.0     | 12.8       | 4.29    | 3.04    | NA      | 201.6        |
| Harrad et al., 2004     | UK          | Birmingham           | Active            | 6         | 9.4                                       | 5          | 1.4       | <b>2.9</b> | 1.8        | NA          | 21              | 7.2                           | 3        | 0.9        | 1       | 0.7     | NA      | 13           |
| ter Schure et al., 2004 | Sweden      | Gotska Sandön Island | Active            | 19        | 1.8                                       | 1.2        | 0.7       | NA         | NA         | 6.1         | 8.6             | 1.4                           | 0.72     | 0.45       | NA      | NA      | 1.8     | 4.4          |
| Gluin et al., 2005      | Canada      | Ontario              | Active (gas)      | 36        | 4.6                                       | 4.3        | NA        | NA         | NA         | NA          | 15              | NA                            | NA       | NA         | NA      | NA      | NA      | NA           |
| Gluin et al., 2005      | Canada      | Ontario              | Active (particle) | 36        | 3.8                                       | 8.8        | 1.1       | 2.5        | <b>1.3</b> | NA          | 20              | NA                            | NA       | NA         | NA      | NA      | NA      | NA           |
| Gluin et al., 2005      | Canada      | Ontario              | Active            | 12        | 2.1                                       | 0.8        | 0.2       | 0.1        | 0.1        | NA          | 2.3             | 1.6                           | 0.48     | 0.1        | 0.033   | 0.04    | NA      | 2.3          |
| Jaward et al., 2005     | China       |                      | Passive           | 32        | <0.13-78                                  | <0.13-50   | <0.13-5.5 | NA         | NA         | NA          | <0.13-340       | <0.1-60                       | <0.08-30 | <0.08-3.5  | NA      | NA      | NA      | <0.07-187    |
| Jaward et al., 2005     | Singapore   |                      | Passive           | 10        | 2.8-10                                    | 2.8-5      | 1-1.5     | NA         | NA         | NA          | 10-29           | 2.2-7.7                       | 1.7-3    | 0.64-0.96  | NA      | NA      | NA      | 5.5-16       |
| Jaward et al., 2005     | Japan       |                      | Passive           | 20        | <0.13-1                                   | 0.4-1.3    | <0.13-0.3 | NA         | NA         | NA          | 5-71            | <0.1-0.8                      | 0.2-0.8  | <0.08-0.19 | NA      | NA      | NA      | 2.8-39       |
| Jaward et al., 2005     | South Korea |                      | Passive           | 15        | <0.13-9                                   | <0.13-10   | <0.13-2.3 | NA         | NA         | NA          | 2-27            | <0.1-6.9                      | <0.08-6  | <0.08-1.5  | NA      | NA      | NA      | 1.1-15       |

**Supplemental Table 3.** MDLs reported in the literature, and MDLs adjusted to sample volume of 150 m<sup>3</sup> and extraction volume of 1 ml. Notes: <sup>a</sup>Peak not present in the blank; <sup>b</sup> NA= not available.

| Reference               | Location | Sampler           | Method                        | Sample volume (m <sup>3</sup> ) | Final extract volume (μl) | Unadjusted MDL (pg m <sup>-3</sup> ) |        |        |                 | Adjusted MDL (pg m <sup>-3</sup> ) |        |        |         |
|-------------------------|----------|-------------------|-------------------------------|---------------------------------|---------------------------|--------------------------------------|--------|--------|-----------------|------------------------------------|--------|--------|---------|
|                         |          |                   |                               |                                 |                           | BDE-47                               | BDE-66 | BDE-99 | BDE-209         | BDE-47                             | BDE-66 | BDE-99 | BDE-209 |
| Karlsson et al., 2007   | indoor   | Active            | 3*blank value                 | 25                              | 40                        | 117                                  | 2.3    | 158    | 173             | 488                                | 10     | 658    | 721     |
| Pettersson et al., 2004 | indoor   | Active            | 5*S/N <sup>a</sup> or 3*blank | 1                               | 40                        | 900                                  | 100    | 1300   | 700             | 150                                | 17     | 217    | 117     |
| Gouin et al., 2005      | outdoor  | Active (vapor)    | mean blank value+3*SD         | 250-400                         | 25                        | 0.4                                  | 0.08   | 1.3    | NA <sup>b</sup> | 35                                 | 7      | 113    | NA      |
| Gouin et al., 2005      | outdoor  | Active (particle) | mean blank value+3*SD         | 250-400                         | 25                        | 0.3                                  | 0.08   | 0.8    | NA              | 26                                 | 7      | 69     | NA      |

**Supplemental Table 4.** Ratio of vapor concentration to total concentration in air samples of two studies and average (%).

| Reference        | Harrad et al., 2004                                                      | Strandberg et al., 2001 | Average |
|------------------|--------------------------------------------------------------------------|-------------------------|---------|
| Sample size      | 3                                                                        | -                       | -       |
| Method           | Random selected samples analyzed separately the vapor and particle phase | modeling                | -       |
| Temperature (°C) | 16-20                                                                    | 20±3                    | -       |
| BDE-47           | 66-86                                                                    | 80                      | 77      |
| BDE-99           | 54-65                                                                    | 55-65                   | 60      |
| BDE-100          | 63-74                                                                    | 55-65                   | 64      |
| BDE-153          | <20-48                                                                   | 30                      | 33      |
| BDE-154          | 37-48                                                                    | 30                      | 38      |
| BDE-209          | -                                                                        | 0                       | 0       |

Supplemental Table 5. Summary of PBDE recoveries in the literature.

| References              | Congeners     | Recovery (%) |
|-------------------------|---------------|--------------|
| Strandberg et al., 2001 | All           | 8-110        |
| Wilford et al., 2004    | BDE-35        | 116±16       |
| Harrad et al., 2004     | All           | 85 (54-104)  |
| Jaward et al., 2005     | All           | 70-107       |
| Harrad et al., 2006     | BDE-153       | 45           |
|                         | BDE-47        | 67           |
| Hazarti & Harrad, 2007  | All (Active)  | 57 (41-78)   |
| Hazarti & Harrad, 2006  | All (Passive) | 62 (42-80)   |
|                         | BDE-77        | 20-95        |
| Karlsson et al., 2007   | BDE-139       | 12-97        |
|                         | BDE-209       | 14-89        |
|                         |               |              |

Supplemental Table 6. Number of measurements with breakthrough <5% compared to total number of samples, grouped by sample volume and congener.

| Congener | Sample Volume       |                         |                     | Total   |
|----------|---------------------|-------------------------|---------------------|---------|
|          | <100 m <sup>3</sup> | 100 -200 m <sup>3</sup> | >200 m <sup>3</sup> |         |
| BDE-17   | 3/3                 | 7/7                     | 3/3                 | 13/13   |
| BDE-28   | 3/3                 | 8/9                     | 3/3                 | 14/15   |
| BDE-75   | 0                   | 2/2                     | 1/1                 | 3/3     |
| BDE-47   | 6/6                 | 6/10                    | 2/3                 | 14/19   |
| BDE-66   | 1/1                 | 4/4                     | 1/1                 | 6/6     |
| BDE-49   | 5/5                 | 5/5                     | 1/1                 | 11/11   |
| BDE-71   | 4/4                 | 6/7                     | 2/3                 | 12/14   |
| BDE-85   | 0                   | 2/2                     | 2/3                 | 4/5     |
| BDE-100  | 6/6                 | 7/10                    | 2/3                 | 15/19   |
| BDE-99   | 6/6                 | 3/10                    | 1/3                 | 10/19   |
| BDE-154  | 1/1                 | 2/3                     | 3/3                 | 6/7     |
| BDE-153  | 0                   | 0/1                     | 2/2                 | 2/3     |
| All      | 33/33               | 52/70                   | 23/28               | 108/131 |
